# Supplementary material for: Molecular Characterization of Carbonic Anhydrase Genes in Lotus japonicus and Their Potential Roles in Symbiotic Nitrogen Fixation
Source: MDPI journal article supplement (doi:10.3390/ijms22157766), 2021-07-21
Supplement: s1 [file s1]

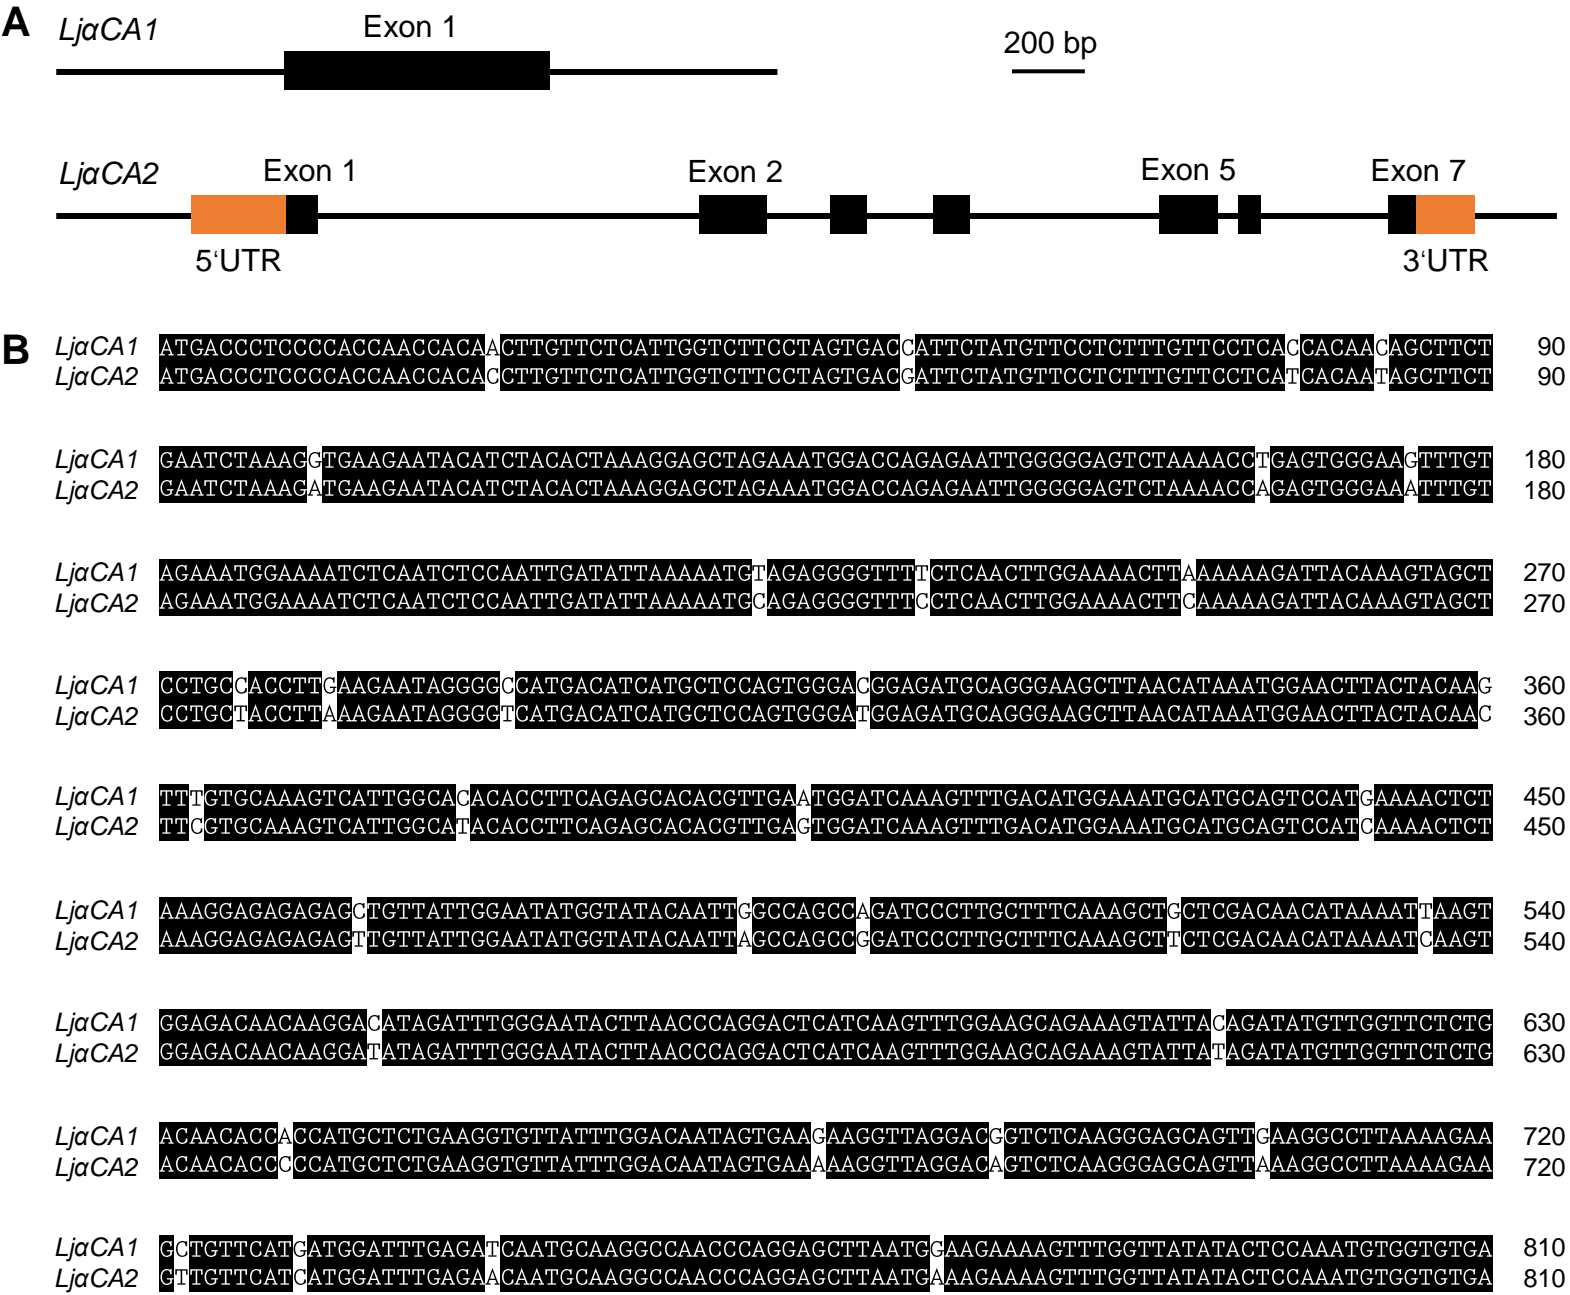

**Figure S1.** Gene models and coding sequence alignment of *LjaCA1* and *LjaCA2*. (A) Gene models of *LjaCA1* and *LjaCA2*. Black boxes indicate the exons and orange boxes indicate the 5' or 3' untranslated regions (UTRs). (B) Coding sequence alignment of *LjaCA1* and *LjaCA2*. Sequence alignment was performed using DNAMAN software with default parameters.

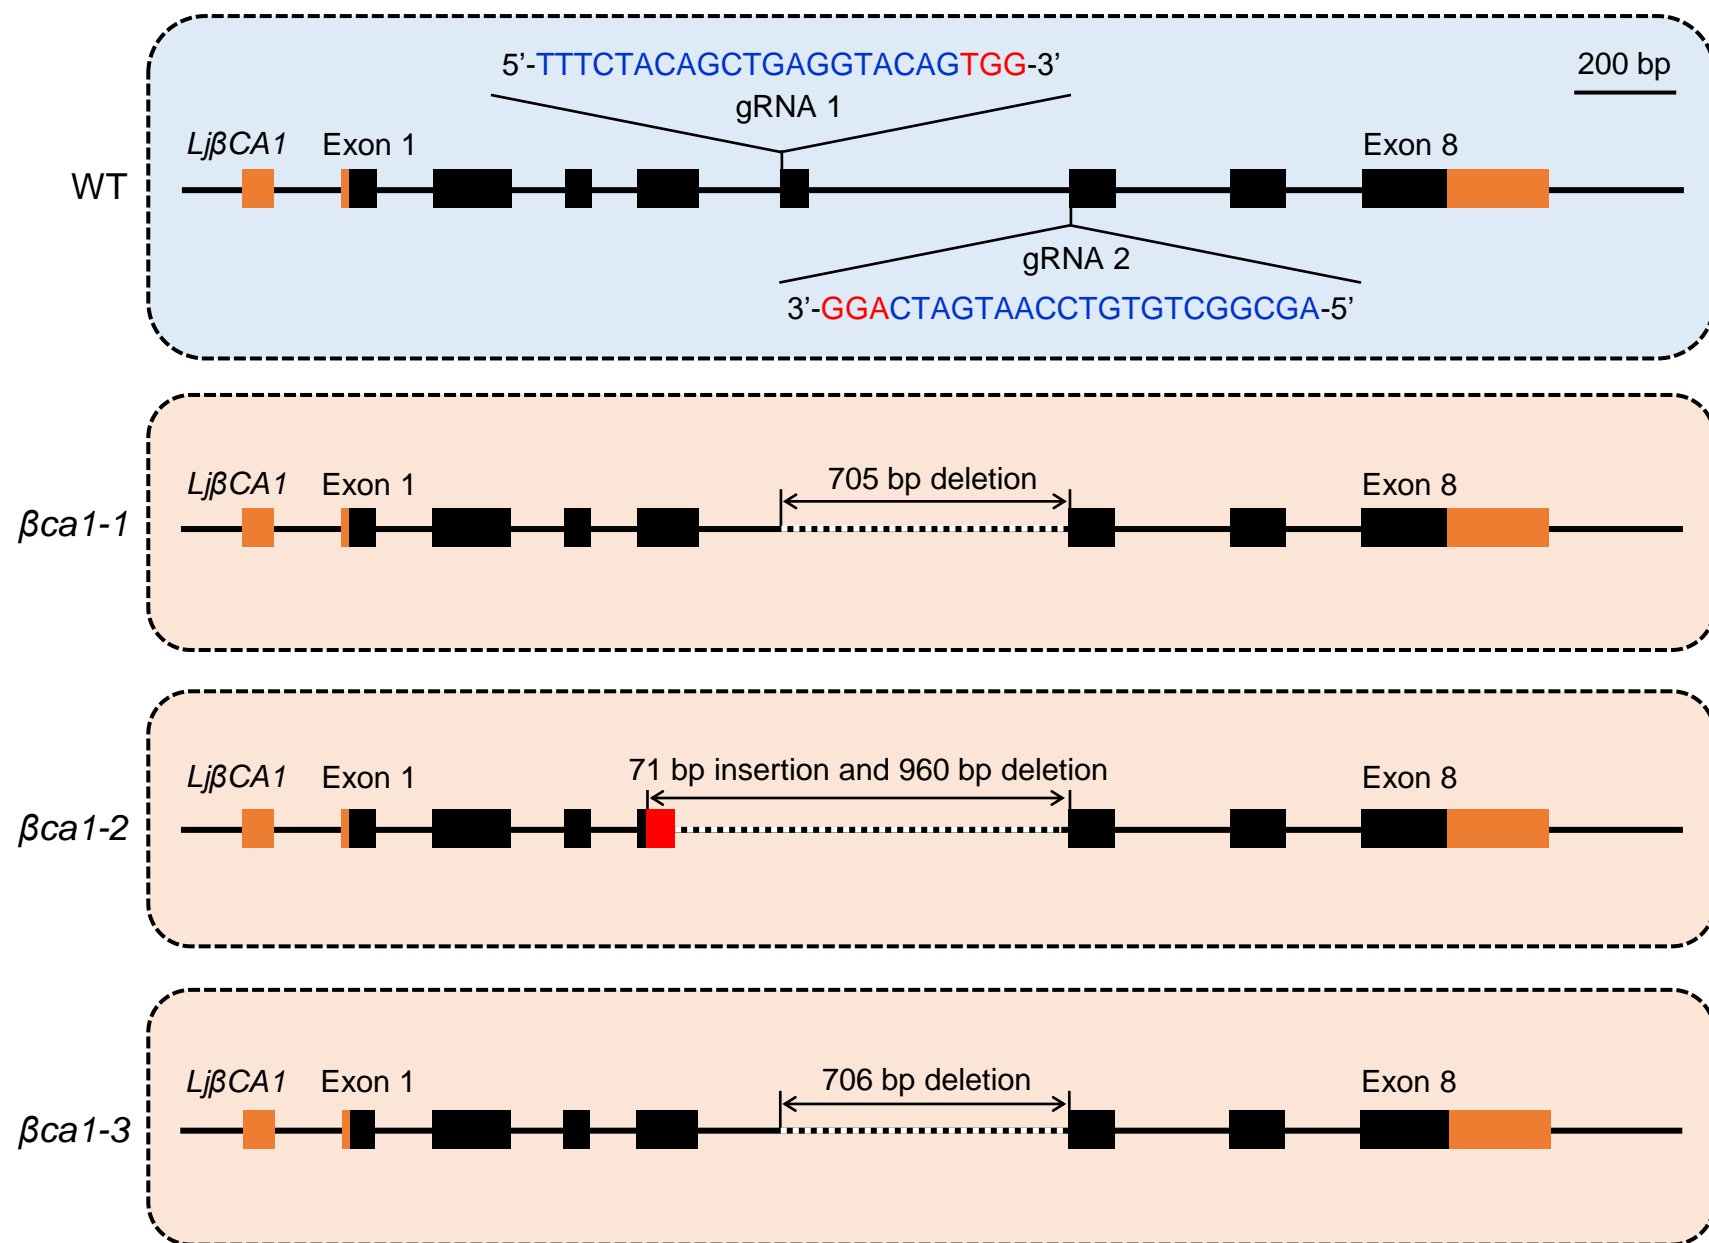

**Figure S2.** Genotyping analysis of CRISPR/Cas9-derived *LjβCA1* mutants. The sequences of *LjβCA1* in each mutant line were confirmed by PCR and sequencing. The schematics show the genotyping information of *LjβCA1* in *βca1-1*, *βca1-2*, *βca1-3* mutants. Black boxes indicate the exons and orange boxes indicate the 5' or 3' untranslated regions (UTRs). Two gRNAs used for the *LjβCA1* knockout experiment were located in exon 5 and exon 6 respectively. PAM sequence was marked in red. 20 bp gRNA sequence was marked in blue. Dotted lines indicate the fragment deletion. The red box indicates the fragment insertion.

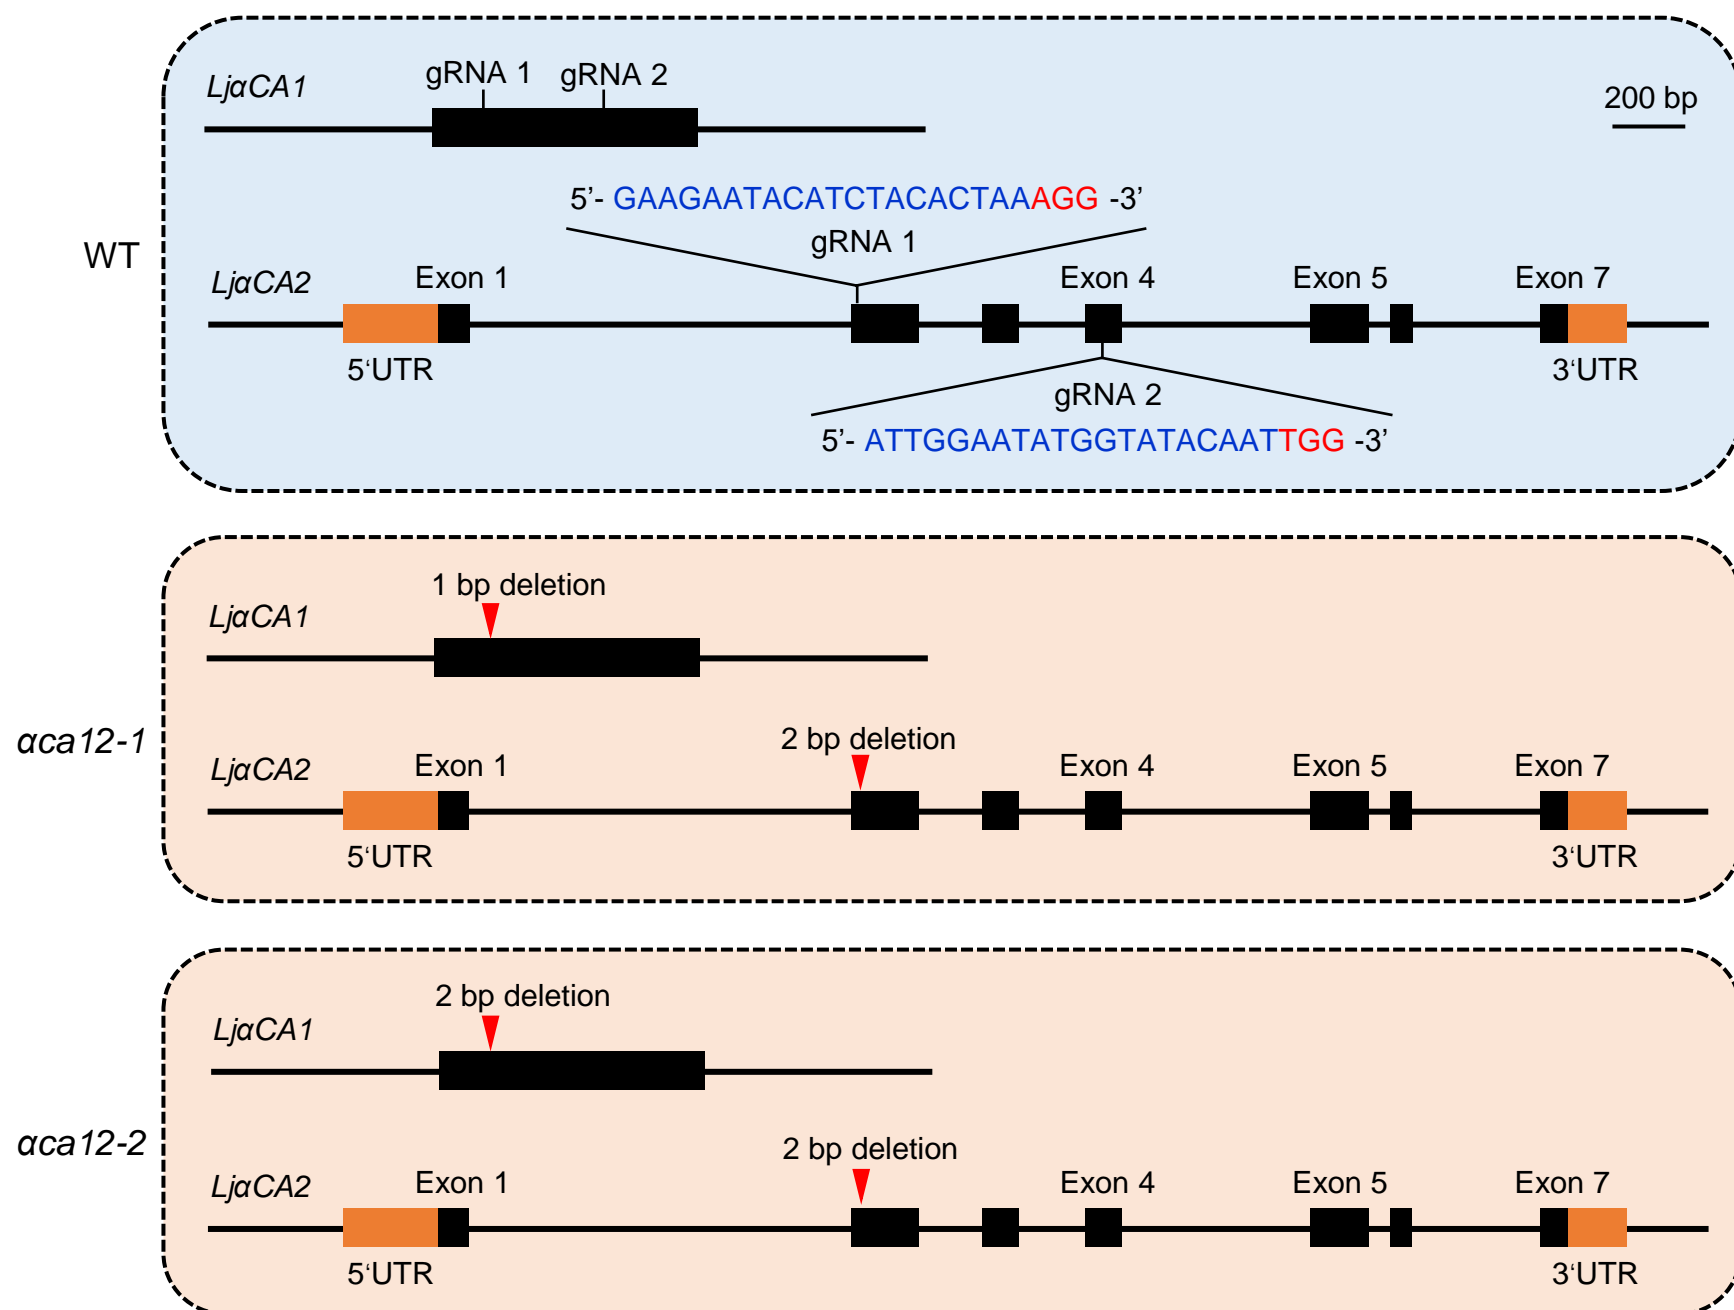

**Figure S3.** Genotyping analysis of CRISPR/Cas9-derived *LjaCA1/2* double mutants. The sequences of *LjaCA1* and *LjaCA2* in each double mutant line were confirmed by PCR and sequencing. The schematics show the genotyping information of *LjaCA1* and *LjaCA2* in *aca12-1*, *aca12-2* mutants. Black boxes indicate the exons and orange boxes indicate the 5' or 3' untranslated regions (UTRs). Two gRNAs used for *LjaCA2* knockout experiment were located in exon 2 and exon 4 respectively. PAM sequence was marked in red. 20 bp gRNA sequence was marked in blue. Red triangles indicate the deletion with 1 or 2 base pairs.

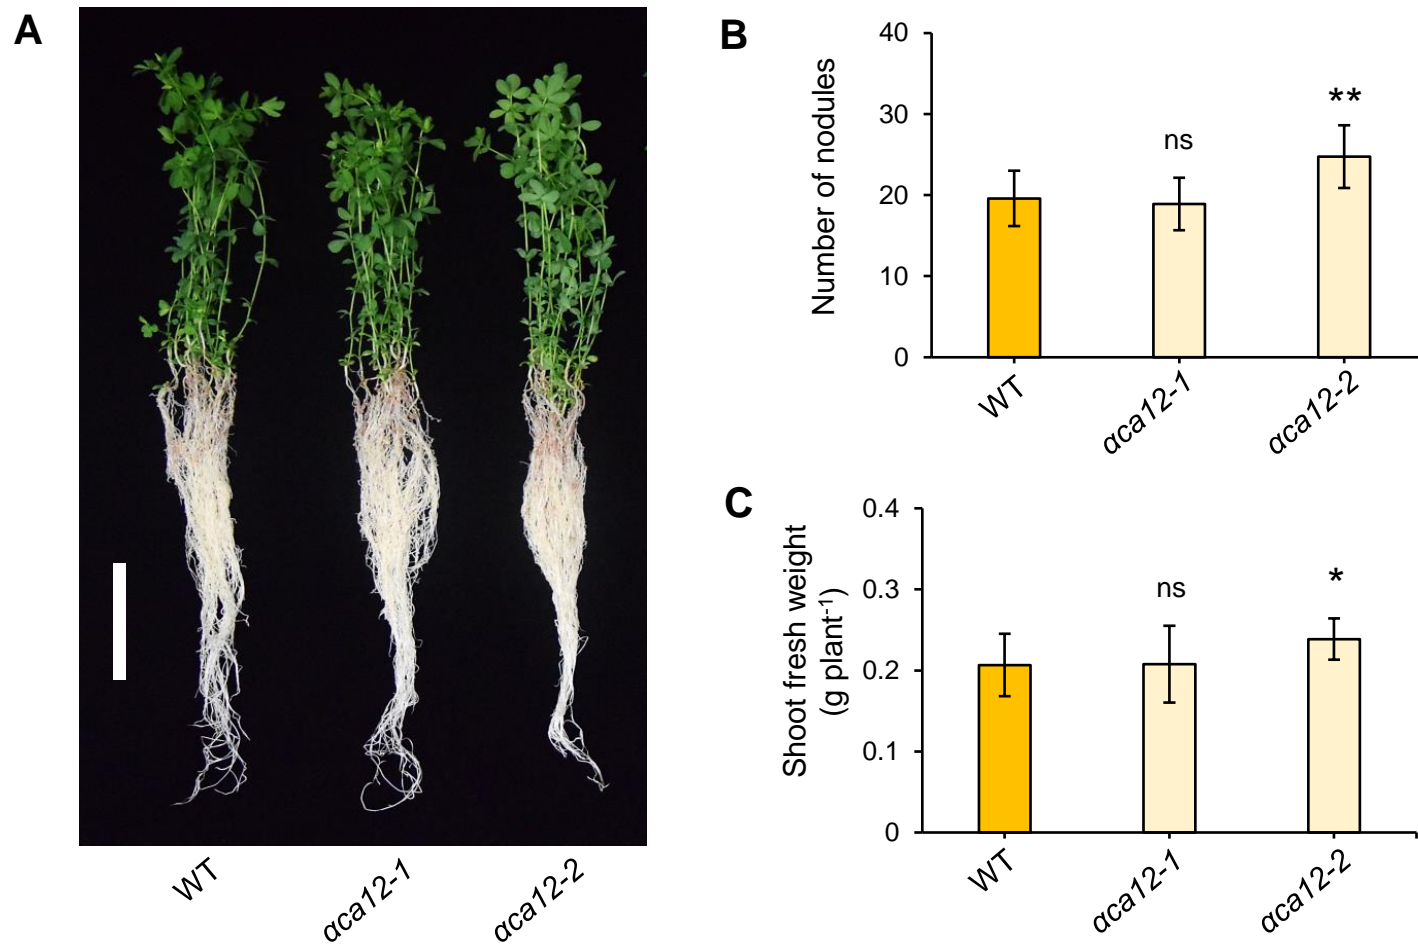

**Figure S4.** Symbiotic phenotypes of *LjαCA1* and *LjαCA2* mutants. (A) Symbiotic phenotypes of plants at 4 wpi. Plants were grown in nitrogen-deficient conditions after inoculation with *M. loti* MAFF303099. Two CRISPR/Cas9-derived mutants (*aca12-1* and *aca12-2*) were compared to the WT plants. Scale bar, 5 cm. (B) Root nodule number, (C) Shoot fresh weight of WT and mutant plants. Values are means ± SD of 12 plants per genotype. Student's t-test was used for statistical analysis in (B and C). ns, not significant; \*,  $P < 0.05$ ; \*\*,  $P < 0.01$ . Phenotyping analysis has been performed three times and similar results were obtained.

|          |        |                                                                                               |     |
|----------|--------|-----------------------------------------------------------------------------------------------|-----|
| <b>A</b> | LjβCA1 | .....MAKHSPDQLAIEEL                                                                           | 14  |
|          | MsCA1  | .....MANQS.SELAIEQL                                                                           | 13  |
|          | GmCA1  | .....MAK.S.SELAIEEL                                                                           | 12  |
|          | AtβCA1 | MSTAPLSGFFLTSLSPSQSSLQKLSLRTSSTVACLPPASSSSSSSSSSSSSSRSVPTLIRNEPVFAAPAPIIAPYWSEEMGTEAYDEAIEAL  | 90  |
|          |        |                                                                                               |     |
|          | LjβCA1 | KKLLIREKEELNESADTKIEDVIAELQLQGCHPTP.ETAEQRRIIDGFTYFKIHNFDKNPDLYKELAKGQSPKFILIFACSDSRVSPTTILNF | 103 |
|          | MsCA1  | KKLLREKEELNEVATTKIEELIVELQ..GCHPQPIDPAEQRIIDGFTYFKLNNFNKNPELYDRLAKGQSPKFMVFACSDSRVSPSIIILNF   | 101 |
|          | GmCA1  | KKLLRDKEEFDAAVAAKVEELIAELQ..GCGPRPYEPAVQRIVDGTFHEKINNEDKNSDLYSQLANGQRPKYLVEFSCSDSRVSATTILNF   | 100 |
|          | AtβCA1 | KKLLIEKEELKTVAALKVEQITAALQTGTSSDKKAFDPVETIKQGEIKFKKEYETNPALYGELAKGQSPKYMVFACSDSRVCPSHVLDE     | 180 |
|          |        |                                                                                               |     |
|          | LjβCA1 | QPGFAFMVRNIANMVPPFNQLRYSVGVAAIEYATLELKVPNIIIGHSRCCGIARLMSPHPEDDSPSFEEFIDDWVKIGLPAKIKVLKEHAS   | 193 |
|          | MsCA1  | QPGFAFKVRNIANMVPPFNQLRYSVGVATFEYATITALKVESILVIGHSRCCGISRLMSPHPEDGSAPYDFIDDWVKIGLSSKVKVLKGHEC  | 191 |
|          | GmCA1  | QPGFAFMVRNIANMVPPFNQLRYSVGVAAIEYATITALKVPNIIIGHSRCCGIQRLMSPHPEDGSAPFDFIDDWVKIGLPAKIKVLKEYEG   | 190 |
|          | AtβCA1 | QPGDAFVVRNIANMVPPFDKVKYGGVAAIEYAVLHLKVENIVVIGHSACGGIKGLMSEFLDGNNSTDFIEDWVKIGLPAKSKVISELGD     | 270 |
|          |        |                                                                                               |     |
|          | LjβCA1 | CDSLEQRTLCEKESVNNSLVNLTYPFVDEQIRSKGLGLEFCVYYDFVNGEFLWKYESHVTKHISIPHCH.....                    | 263 |
|          | MsCA1  | NDFKEQCKFCEMDSVNNSLVNLTYPYVDSEIRNENLALLCGYYDFVNGEFLWKYKTHVTKSVTIPLNGFDMTK..                   | 266 |
|          | GmCA1  | YDFKEQCKFCEKESVNNSLVNLTYPYVEKGIRKNIALLCGYYDFVNGEFLWKYESHITEPISIPLCTH.....                     | 261 |
|          | AtβCA1 | SAFEDQCGRCEREAVNVSLANLLTYPFVREGLVKGTALALKGGYYDFVKGAEELWGLEFGLSETSSVKDVAITILHWKL               | 347 |

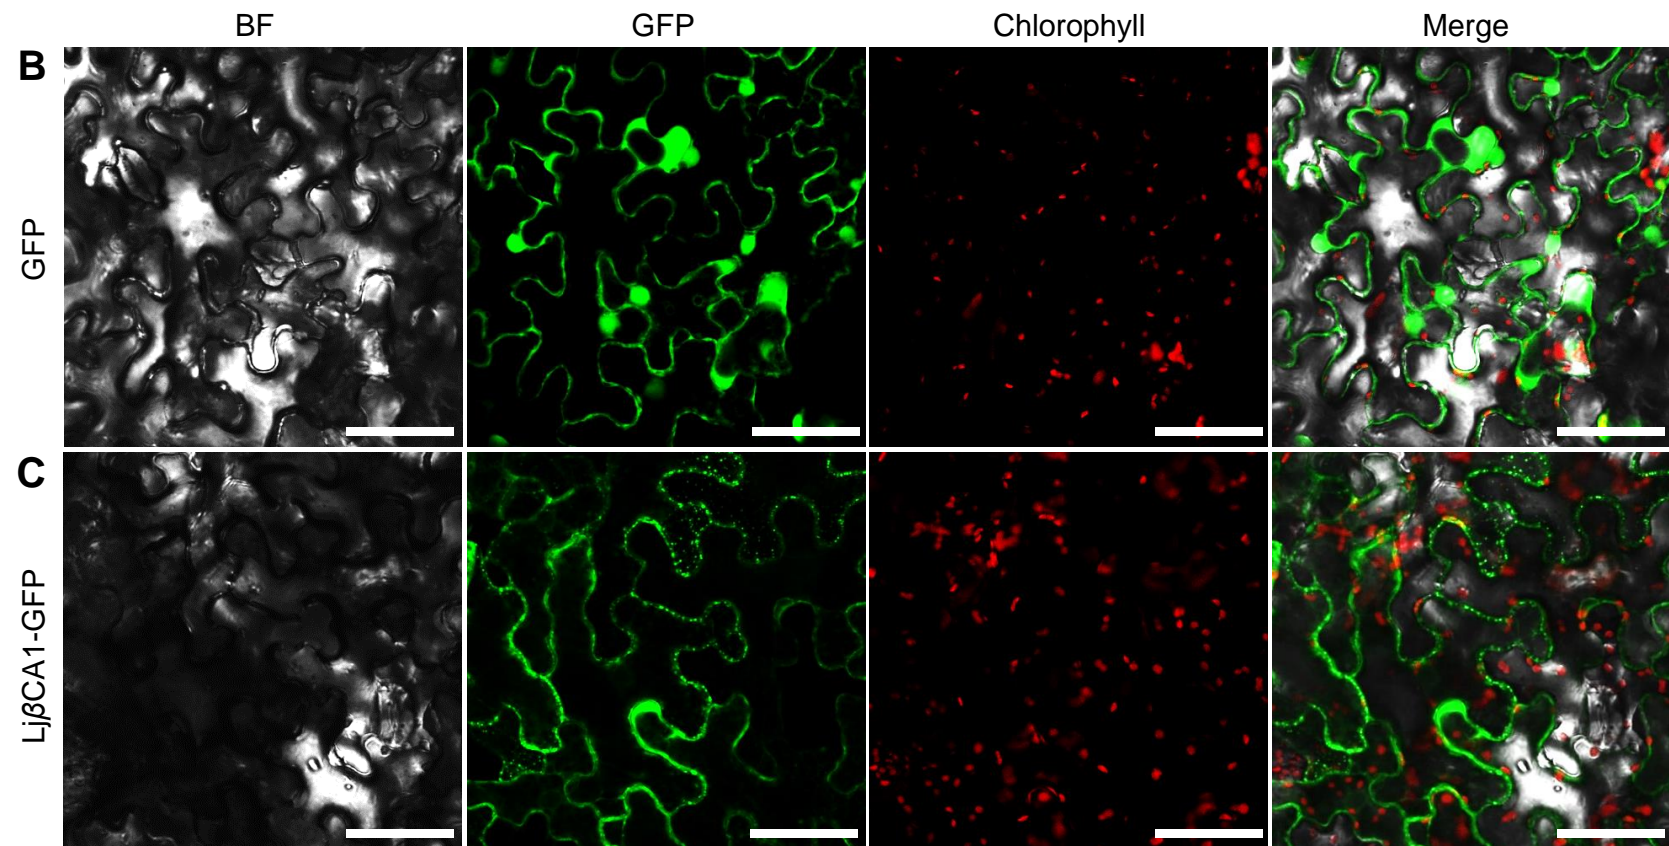

**Figure S5.** Subcellular localization of LjβCA1 in *Nicotiana benthamiana* leaves. (A) Protein sequence alignment of LjβCA1 and its homologs in Alfalfa, Soybean, and Arabidopsis. LjβCA1 (Lj1g3v0410090.1), MsCA1 (GenBank: CAA63712.1), GmCA1 (GenBank: CAB43571.1), and AtβCA1 (At3g01500.2). Sequence alignment was performed using DNAMAN software with default parameters. (B-C) Tobacco epidermal cells were imaged at 48 hrs after infiltration for GFP (B) or LjβCA1-GFP fusion protein (C). The green signal in the GFP channel shows fluorescence from GFP or LjβCA1-GFP fusion protein. The red signal in the Chlorophyll channel shows the autofluorescence of chlorophyll. BF, bright field. Merged images of the BF, GFP, and Chlorophyll channels were shown. Scale bars, 50 μm (B, C).

**Supplemental Table 1.** Expression profiles of *LjCAs* in different plant tissues in *Lotus japonicus* Expression Atlas

| Gene                             | Gene ID       | Root | Stem | Leaf  | Flower | Pod-20d | Seed-20d | Nodule-21d |
|----------------------------------|---------------|------|------|-------|--------|---------|----------|------------|
| <i>LjaCA1</i>                    | Lj0g3v0129349 | 17   | 18   | 16    | 25     | 18      | 17       | 2908       |
| <i>LjaCA2</i>                    | Lj1g3v4226880 | 18   | 19   | 15    | 123    | 17      | 16       | 10419      |
| <i>LjaCA3</i>                    | Lj3g3v3082370 | 18   | 16   | 13    | 13     | 15      | 13       | 22         |
| <i>LjaCA4</i>                    | Lj5g3v0670150 | 304  | 99   | 43    | 149    | 31      | 41       | 157        |
| <i>LjaCA5</i>                    | Lj5g3v0670540 | -    | -    | -     | -      | -       | -        | -          |
| <i>LjaCA6</i>                    | Lj5g3v0780660 | 17   | 694  | 235   | 423    | 61      | 24       | 4693       |
| <i>Lj<math>\beta</math>CA1</i>   | Lj1g3v0410090 | 17   | 15   | 18    | 15     | 13      | 13       | 14023      |
| <i>Lj<math>\beta</math>CA2</i>   | Lj2g3v1002750 | 150  | 9414 | 18082 | 7371   | 526     | 32       | 63         |
| <i>Lj<math>\beta</math>CA3</i>   | Lj2g3v1403790 | 6563 | 2795 | 3634  | 2192   | 3418    | 1289     | 2635       |
| <i>Lj<math>\beta</math>CA4</i>   | Lj6g3v2193530 | 278  | 918  | 1823  | 1203   | 486     | 434      | 131        |
| <i>Lj<math>\gamma</math>CA1</i>  | Lj1g3v2124850 | 5197 | 3376 | 2823  | 3645   | 3106    | 3198     | 5372       |
| <i>Lj<math>\gamma</math>CA2</i>  | Lj2g3v1731290 | 2637 | 2349 | 2285  | 2655   | 2725    | 2895     | 3154       |
| <i>Lj<math>\gamma</math>CAL1</i> | Lj4g3v2916460 | 2852 | 2505 | 1537  | 2015   | 1517    | 1794     | 2451       |

These data were retrieved from *Lotus japonicus* Expression Atlas (<https://lotus.au.dk/express/>). Raw data of expression levels of *LjCAs* were shown in this table.



**Supplemental Table 2.** Primers used for plasmid construction, RT-PCR and genotyping

| Oligo Name                 | Sequence (5'->3')                     | Purpose                                               |
|----------------------------|---------------------------------------|-------------------------------------------------------|
| $\alpha$ CA2pro2934-F      | GATCTACAGCGCTGACGCTCGGAGTATGATCTAGATG | Construct <i>p<math>\alpha</math>CA2::GUS</i>         |
| $\alpha$ CA2pro-R          | ACTGACCACCCGGGGGTGGTGGTGTGACTATTGATC  | Construct <i>p<math>\alpha</math>CA2::GUS</i>         |
| $\alpha$ CA6pro3002-F      | GATCTACAGCGCTGATGTATGTCTTGGTGCACCTGTG | Construct <i>p<math>\alpha</math>CA6::GUS</i>         |
| $\alpha$ CA6pro-R          | ACTGACCACCCGGGGGTGGATAGCTAGCTGTGTATG  | Construct <i>p<math>\alpha</math>CA6::GUS</i>         |
| $\beta$ CA1pro2764-F       | GATCTACAGCGCTCACGGAGATCCCAAATAAGTGGTG | Construct <i>p<math>\beta</math>CA1::GUS</i>          |
| $\beta$ CA1pro-R           | ACTGACCACCCGGGATTTTTCCCTTTCTTCTGCAG   | Construct <i>p<math>\beta</math>CA1::GUS</i>          |
| $\beta$ CA1pro-tYFP-F      | AGATCTACAGCGCTAGAGATCCCAAATAAGTGGTG   | Construct <i>p<math>\beta</math>CA1::tYFP-NLS</i>     |
| $\beta$ CA1pro-tYFP-R      | GTCGACCTGCAGCCAATTTTTCCCTTTCTTCTGCAG  | Construct <i>p<math>\beta</math>CA1::tYFP-NLS</i>     |
| F-BamHI- $\beta$ CA1-CDS   | AGTGGATCCATGGCAAAGCATTACCTGAC         | Construct <i>p35S::<math>\beta</math>CA1-GFP</i>      |
| R-SmaI- $\beta$ CA1-CDS    | CACCCCGGGGTGACAGTGAGGGATAGAAATG       | Construct <i>p35S::<math>\beta</math>CA1-GFP</i>      |
| F-RsaI- $\beta$ CA1-gRNA1  | GTTCGTTTCTACAGCTGAGGTACAG             | Construct <i><math>\beta</math>CA1</i> CRISPR plasmid |
| R-RsaI- $\beta$ CA1-gRNA1  | AAACCTGTACCTCAGCTGTAGAAAC             | Construct <i><math>\beta</math>CA1</i> CRISPR plasmid |
| F-BclII- $\beta$ CA1-gRNA2 | GTTCGAGCGGCTGTGTCCAATGATC             | Construct <i><math>\beta</math>CA1</i> CRISPR plasmid |
| R-BclII- $\beta$ CA1-gRNA2 | AAACGATCATTGGACACAGCCGCTC             | Construct <i><math>\beta</math>CA1</i> CRISPR plasmid |
| $\beta$ CA1-exon3-F        | ACCCGGATCTATACAAGGAAC                 | Genotyping of <i><math>\beta</math>cal</i> mutants    |
| $\beta$ CA1-exon7-R        | CACCCAATCGTCTATGAACTC                 | Genotyping of <i><math>\beta</math>cal</i> mutants    |
| $\beta$ CA1-intron5-R      | TGAAATGGGTGAGTTGTCTG                  | Genotyping of <i><math>\beta</math>cal</i> mutants    |
| $\beta$ CA1-intron4-F      | TCTGCAGCATCATCACTCTG                  | Genotyping of <i><math>\beta</math>cal</i> mutants    |

|                        |                                 |                                                          |
|------------------------|---------------------------------|----------------------------------------------------------|
| $\beta$ CA1-exon6-R    | CGTCTTACAAGGAAGGAGAATC          | Genotyping of <i><math>\beta</math>cal</i> mutants       |
| F- $\alpha$ CA12-gRNA1 | GTTCTGAAGAATACATCTACACTAA       | Construct <i><math>\alpha</math>CA1/2</i> CRISPR plasmid |
| R- $\alpha$ CA12-gRNA1 | AAACTTAGTGTAGATGTATTCTTC        | Construct <i><math>\alpha</math>CA1/2</i> CRISPR plasmid |
| F- $\alpha$ CA12-gRNA2 | GTTCTGATTGGAATATGGTATACAAT      | Construct <i><math>\alpha</math>CA1/2</i> CRISPR plasmid |
| R- $\alpha$ CA12-gRNA2 | AAACATTGTATACCATATTCCAATC       | Construct <i><math>\alpha</math>CA1/2</i> CRISPR plasmid |
| $\alpha$ CA1-intron1-F | CTGCACCAATGAGATGACAG            | Genotyping of <i><math>\alpha</math>CA1/2</i> mutants    |
| $\alpha$ CA1-intron4-R | AACTCAACCACACCAGCATG            | Genotyping of <i><math>\alpha</math>CA1/2</i> mutants    |
| $\alpha$ CA2-CDS-F     | AGTGGATCCATGACCCTCCCCACCAACCAC  | Genotyping of <i><math>\alpha</math>CA1/2</i> mutants    |
| $\alpha$ CA2-CDS-R     | CACCCCGGGCACCACATTTGGAGTATATAAC | Genotyping of <i><math>\alpha</math>CA1/2</i> mutants    |
| Ub-SqF                 | CGTGAAGGCTAAGATCCAGGATAAG       | Semi-quantitative RT-PCR                                 |
| Ub-SqR                 | CGATACTACTTGTTCAAGAGGGGC        | Semi-quantitative RT-PCR                                 |
| $\beta$ CA2-SqF        | CAGCTAGGGACAACATCATC            | Semi-quantitative RT-PCR                                 |
| $\beta$ CA2-SqR        | TGTGCAGAGCTCTCCAAAAG            | Semi-quantitative RT-PCR                                 |
| $\beta$ CA3-SqF        | ATTGGACATAGCTGCTGTGG            | Semi-quantitative RT-PCR                                 |
| $\beta$ CA3-SqR        | CCACAGCTCAAAATTGCCAG            | Semi-quantitative RT-PCR                                 |
| $\beta$ CA4-SqF        | GCTGAAGCTGAAGATGAGTGTG          | Semi-quantitative RT-PCR                                 |
| $\beta$ CA4-SqR        | GCATTTGTTTCTGTGGGTCC            | Semi-quantitative RT-PCR                                 |
| $\alpha$ CA3-SqF       | CCATTGGCATTCTCCATCTG            | Semi-quantitative RT-PCR                                 |
| $\alpha$ CA3-SqR       | GGTCTTGCATTTGTATCCGAG           | Semi-quantitative RT-PCR                                 |
| $\alpha$ CA4-SqF       | CACTCACCTTCTGAACACAC            | Semi-quantitative RT-PCR                                 |



|                  |                         |                                           |
|------------------|-------------------------|-------------------------------------------|
| $\alpha$ CA4-SqR | CTCTGAGCATGATCATGGAC    | Semi-quantitative RT-PCR                  |
| $\alpha$ CA5-SqF | GGCAACAAGATAGCTGTGGT    | Semi-quantitative RT-PCR                  |
| $\alpha$ CA5-SqR | CTTGGCCTTGCATTCATCTC    | Semi-quantitative RT-PCR                  |
| Ubi-qF           | TTCACCTTGTGCTCCGTCTTC   | Quantitative RT-PCR                       |
| Ubi-qR           | AACAACAGCACACACAGACAATC | Quantitative RT-PCR                       |
| $\beta$ CA1-qF   | CCAAACATCCTGATCATTGGAC  | Semi-quantitative and quantitative RT-PCR |
| $\beta$ CA1-qR   | CTTGATTTTGGCAGGTAAACCA  | Semi-quantitative and quantitative RT-PCR |
| $\alpha$ CA2-qF  | TGAGATCAATGCAAGGCCAAC   | Semi-quantitative and quantitative RT-PCR |
| $\alpha$ CA2-qR  | CCCTTCACACCACATTTGGAGT  | Semi-quantitative and quantitative RT-PCR |
| $\alpha$ CA6-qF  | ATGCCCAAATTCCTATCGGC    | Semi-quantitative and quantitative RT-PCR |
| $\alpha$ CA6-qR  | CCTGCTGTGTGTCCTTGCATT   | Semi-quantitative and quantitative RT-PCR |
